# Supplementary material for: Prion-Associated Toxicity is Rescued by Elimination of Cotranslational Chaperones
Source: PubMed Central journal article supplement (PMC5102407; doi:10.1371/journal.pgen.1006431), 2016-11-09
Supplement: pgen.1006431.s010.pdf [file pgen.1006431.s010.pdf]

S1 Table

| Strain<br><i>all [PSI+]</i> | Robust<br>toxicity<br>rescue | Resists<br>canavanine | Ssb binding to<br>Sup35<br><i>relative to WT</i> | Sensitive<br>to HygB | Sensitive<br>to SsaOE | Resistant<br>to Hsp104<br>curing | Altered<br>Sup35<br>aggregates | Joining<br>defect |
|-----------------------------|------------------------------|-----------------------|--------------------------------------------------|----------------------|-----------------------|----------------------------------|--------------------------------|-------------------|
| WT                          | <i>no</i>                    | <i>no</i>             | X                                                | <i>no</i>            | <i>no</i>             | <i>no</i>                        | <i>no</i>                      | <i>no</i>         |
| <i>egd1Δ</i>                | <i>no</i>                    | <i>no</i>             | <i>unchanged</i>                                 | YES                  | <i>no</i>             | moderate                         | <i>no</i>                      | <i>no</i>         |
| <i>egd2Δ</i>                | <i>no</i>                    | YES                   | <i>n.s</i>                                       | <i>no</i>            | <i>no</i>             | YES                              | <i>no</i>                      | <i>no</i>         |
| <i>egd1Δegd2Δ</i>           | YES                          | YES                   | reduced                                          | YES                  | YES                   | YES                              | YES                            | YES               |
| <i>btt1Δ</i>                | <i>no</i>                    | YES                   | increased                                        | <i>no</i>            | <i>no</i>             | YES                              | <i>no</i>                      | <i>no</i>         |
| <i>egd1Δbtt1Δ</i>           | YES                          | YES                   | reduced                                          | YES                  | YES                   | YES                              | <i>no</i>                      | YES               |
| <i>egd2Δbtt1Δ</i>           | <i>no</i>                    | YES                   | <i>unchanged</i>                                 | <i>no</i>            | YES                   | YES                              | <i>no</i>                      | <i>no</i>         |
| NACΔ                        | <i>no</i>                    | YES                   | <i>n.s</i>                                       | YES                  | YES                   | YES                              | <i>no</i>                      | <i>no</i>         |
