# Supplementary material for: Prion-Associated Toxicity is Rescued by Elimination of Cotranslational Chaperones
Source: PubMed Central journal article supplement (PMC5102407; doi:10.1371/journal.pgen.1006431), 2016-11-09
Supplement: pgen.1006431.s011.pdf [file pgen.1006431.s011.pdf]

S2 Table

| Strain | Description                                                                                                                                                               | Reference  |
|--------|---------------------------------------------------------------------------------------------------------------------------------------------------------------------------|------------|
| SL2598 | 74D-694; Strong [ <i>PSI</i> +], MAT $\alpha$ , ade1-14(UGA), trp1-289(UAG), his3 $\Delta$ -200, ura3-52, leu2-3,112                                                      | [55]       |
| 1271   | 74D-694; Strong [ <i>PSI</i> +], MAT $\alpha$ , ade1-14 his 3 $\Delta$ -200 trp 1-289 ura3-52 leu2-3,112 egd1 $\Delta$ ::KanMX4                                           | This study |
| 1147   | 74D-694; Strong [ <i>PSI</i> +], MAT $\alpha$ , ade1-14 his 3 $\Delta$ -200 trp 1-289 ura3-52 leu2-3,112 egd2 $\Delta$ ::loxP                                             | This study |
| 1148   | 74D-694; Strong [ <i>PSI</i> +], MAT $\alpha$ , ade1-14 his 3 $\Delta$ -200 trp 1-289 ura3-52 leu2-3,112 egd1 $\Delta$ ::KanMX4 egd2 $\Delta$ ::loxP – clone #1           | This study |
| 962    | 74D-694; Strong [ <i>PSI</i> +], MAT $\alpha$ , ade1-14 his 3 $\Delta$ -200 trp 1-289 ura3-52 leu2-3,112 btt1 $\Delta$ ::HIS5                                             | This study |
| 966    | 74D-694; Strong [ <i>PSI</i> +], MAT $\alpha$ , ade1-14 his 3 $\Delta$ -200 trp 1-289 ura3-52 leu2-3,112 egd1 $\Delta$ ::KanMX4 btt1 $\Delta$ ::HIS5                      | This study |
| 1150   | 74D-694; Strong [ <i>PSI</i> +], MAT $\alpha$ , ade1-14 his 3 $\Delta$ -200 trp 1-289 ura3-52 leu2-3,112 btt1 $\Delta$ ::loxP egd2 $\Delta$ ::loxP                        | This study |
| 1152   | 74D-694; Strong [ <i>PSI</i> +], MAT $\alpha$ , ade1-14 his 3 $\Delta$ -200 trp 1-289 ura3-52 leu2-3,112 egd1 $\Delta$ ::KanMX4 btt1 $\Delta$ ::loxP egd2 $\Delta$ ::loxP | This study |
| 2352   | 74D-694; [ <i>psi</i> -],mediuim [ <i>RNQ</i> +], MAT $\alpha$ , ade1-14, trp1-289(UAG), his3 $\Delta$ -200, leu2-3,112, $\rho$ 0, kar1- $\Delta$ 15                      | [47]       |
| 2090   | 74D-694; [ <i>psi</i> -],medium [ <i>RNQ</i> +] MAT $\alpha$ , ade1-14, trp1-289(UAG), his3 $\Delta$ -200, leu2-3,112, $\rho$ 0, kar1- $\Delta$ 15                        | [47]       |
| SL3014 | 74D-694; [ <i>psi</i> -], MAT $\alpha$ , ade1-14, his 3 $\Delta$ -200 trp 1-289 ura3-52 leu2-3,112                                                                        | [55]       |
| 1142   | 74D-694; Strong [ <i>PSI</i> +], MAT $\alpha$ , ade1-14, his 3 $\Delta$ -200 trp 1-289 ura3-52, leu2-3,112, ssb1 $\Delta$ ::loxP                                          | This study |
| 1149   | 74D-694; Strong [ <i>PSI</i> +], MAT $\alpha$ , ade1-14 his 3 $\Delta$ -200 trp 1-289 ura3-52 leu2-3,112 egd1 $\Delta$ ::KanMX4 egd2 $\Delta$ ::loxP – clone #2           | This study |
