# Supplementary material for: Prion-Associated Toxicity is Rescued by Elimination of Cotranslational Chaperones
Source: PubMed Central journal article supplement (PMC5102407; doi:10.1371/journal.pgen.1006431), 2016-11-09
Supplement: pgen.1006431.s012.pdf [file pgen.1006431.s012.pdf]

**S3 Table**

| <b>Plasmid</b> | <b>Description and use</b>                                         | <b>Reference</b> |
|----------------|--------------------------------------------------------------------|------------------|
| 5162           | pCUP-Sup35-GFP. Copper-inducible expression of Sup35-GFP.          | This study       |
| 6244           | pEMBL-Sup35. Overexpression of Sup35.                              | [56]             |
| SL6435         | pUKC815. Control for nonsense suppression assay. PGK1-LacZ fusion. | [20]             |
| SL6436         | pUKC817. Nonsense suppression assay. PGK1(TAA)LacZ fusion.         | [20]             |
| SL6437         | pUKC818. Nonsense suppression assay. PGK1(TAG)LacZ fusion.         | [20]             |
| SL6438         | pUKC819. Nonsense suppression assay. PGK1(TGA)LacZ fusion.         | [20]             |
| SL7280         | p426GPD-Hsp104. Used for the overexpression of Hsp104.             | [57]             |
| 6221           | pCUP-Sup35NM-GFP. Copper-inducible expression of Sup35NM-GFP.      | [55]             |
| 6765           | p424GPD-Hsp104. Used for the overexpression of Hsp104.             | This study       |
| 6391           | p415GPD-Ssa1. Overexpression of Ssa1.                              | This study       |
| 6750           | p415GPD-Ssb1. Overexpression of Ssb1.                              | This study       |
| 6751           | P415GPD-Ssb2. Overexpression of Ssb2.                              | This study       |
| EC1219         | pRS316K-SSB1. Wild type Ssb1, “BBB.”                               | [29]             |
| EC1327         | pRS316K-SSA1. Wild type Ssa1, “AAA.”                               | [29]             |
| EC1659         | pRS316K-ABB. Chimera of Ssa1 and Ssb1.                             | [29]             |
| EC1662         | pRS316K-BAA. Chimera of Ssa1 and Ssb1.                             | [29]             |
| EC1695         | pRS316K-AAB. Chimera of Ssa1 and Ssb1.                             | [29]             |
| EC1696         | pRS316K-ABA. Chimera of Ssa1 and Ssb1.                             | [29]             |
| EC1697         | pRS316K-BAB. Chimera of Ssa1 and Ssb1.                             | [29]             |
| EC1698         | pRS316K-BBA. Chimera of Ssa1 and Ssb1.                             | [29]             |
