# Supplementary material for: Prion-Associated Toxicity is Rescued by Elimination of Cotranslational Chaperones
Source: PubMed Central journal article supplement (PMC5102407; doi:10.1371/journal.pgen.1006431), 2016-11-09
Supplement: pgen.1006431.s013.pdf [file pgen.1006431.s013.pdf]

**S4 Table**

| <b>Antigen</b> | <b>Production notes</b> | <b>Type</b>       | <b>Dilution</b>           | <b>Source</b>    |
|----------------|-------------------------|-------------------|---------------------------|------------------|
| Sup35          | Peptide, a.a.s 137-151  | Rabbit polyclonal | 1:1,500                   | True lab         |
| Rnq1           | Full-length Rnq1        | Rabbit polyclonal | 1:1,000                   | True lab         |
| Ssb1/2         | C-terminal 80 a.a.s     | Rabbit polyclonal | 1:2,000                   | Craig lab [58]   |
| Rpl3           | IgG2b, ascites          | Mouse monoclonal  | 1:2,500                   | Warner lab [59]  |
| Hsp104         | Carboxy terminus        | Rabbit polyclonal | 1:3,000                   | Glover lab [60]  |
| Sis1           | Peptide, a.a.s 339-352  | Rabbit polyclonal | 1:5,000                   | Cosmo Bio p89    |
| GFP            | N-terminal peptide      | Mouse monoclonal  | 1:1,000                   | Thermo MA5-15256 |
| Ssa            | C-terminal 56 a.a.s     | Rabbit polyclonal | 1:2,000                   | Craig lab [58]   |
| Ubiquitin      | Full-length bovine Ub   | Mouse monoclonal  | 1:500                     | Santa Cruz 8017  |
| Rabbit         | Rabbit IgG              | Goat polyclonal   | 1:10,000 unless specified | Sigma A0545      |
| Mouse          | Mouse IgG               | Rabbit polyclonal | 1:10,000 unless specified | Sigma A9044      |
